# Supplementary material
Source: PubMed Central journal article supplement (PMC9481673)
Supplement: NIHMS1821111-supplement-2.pdf [file NIHMS1821111-supplement-2.pdf]

## Supplementary Figure 1

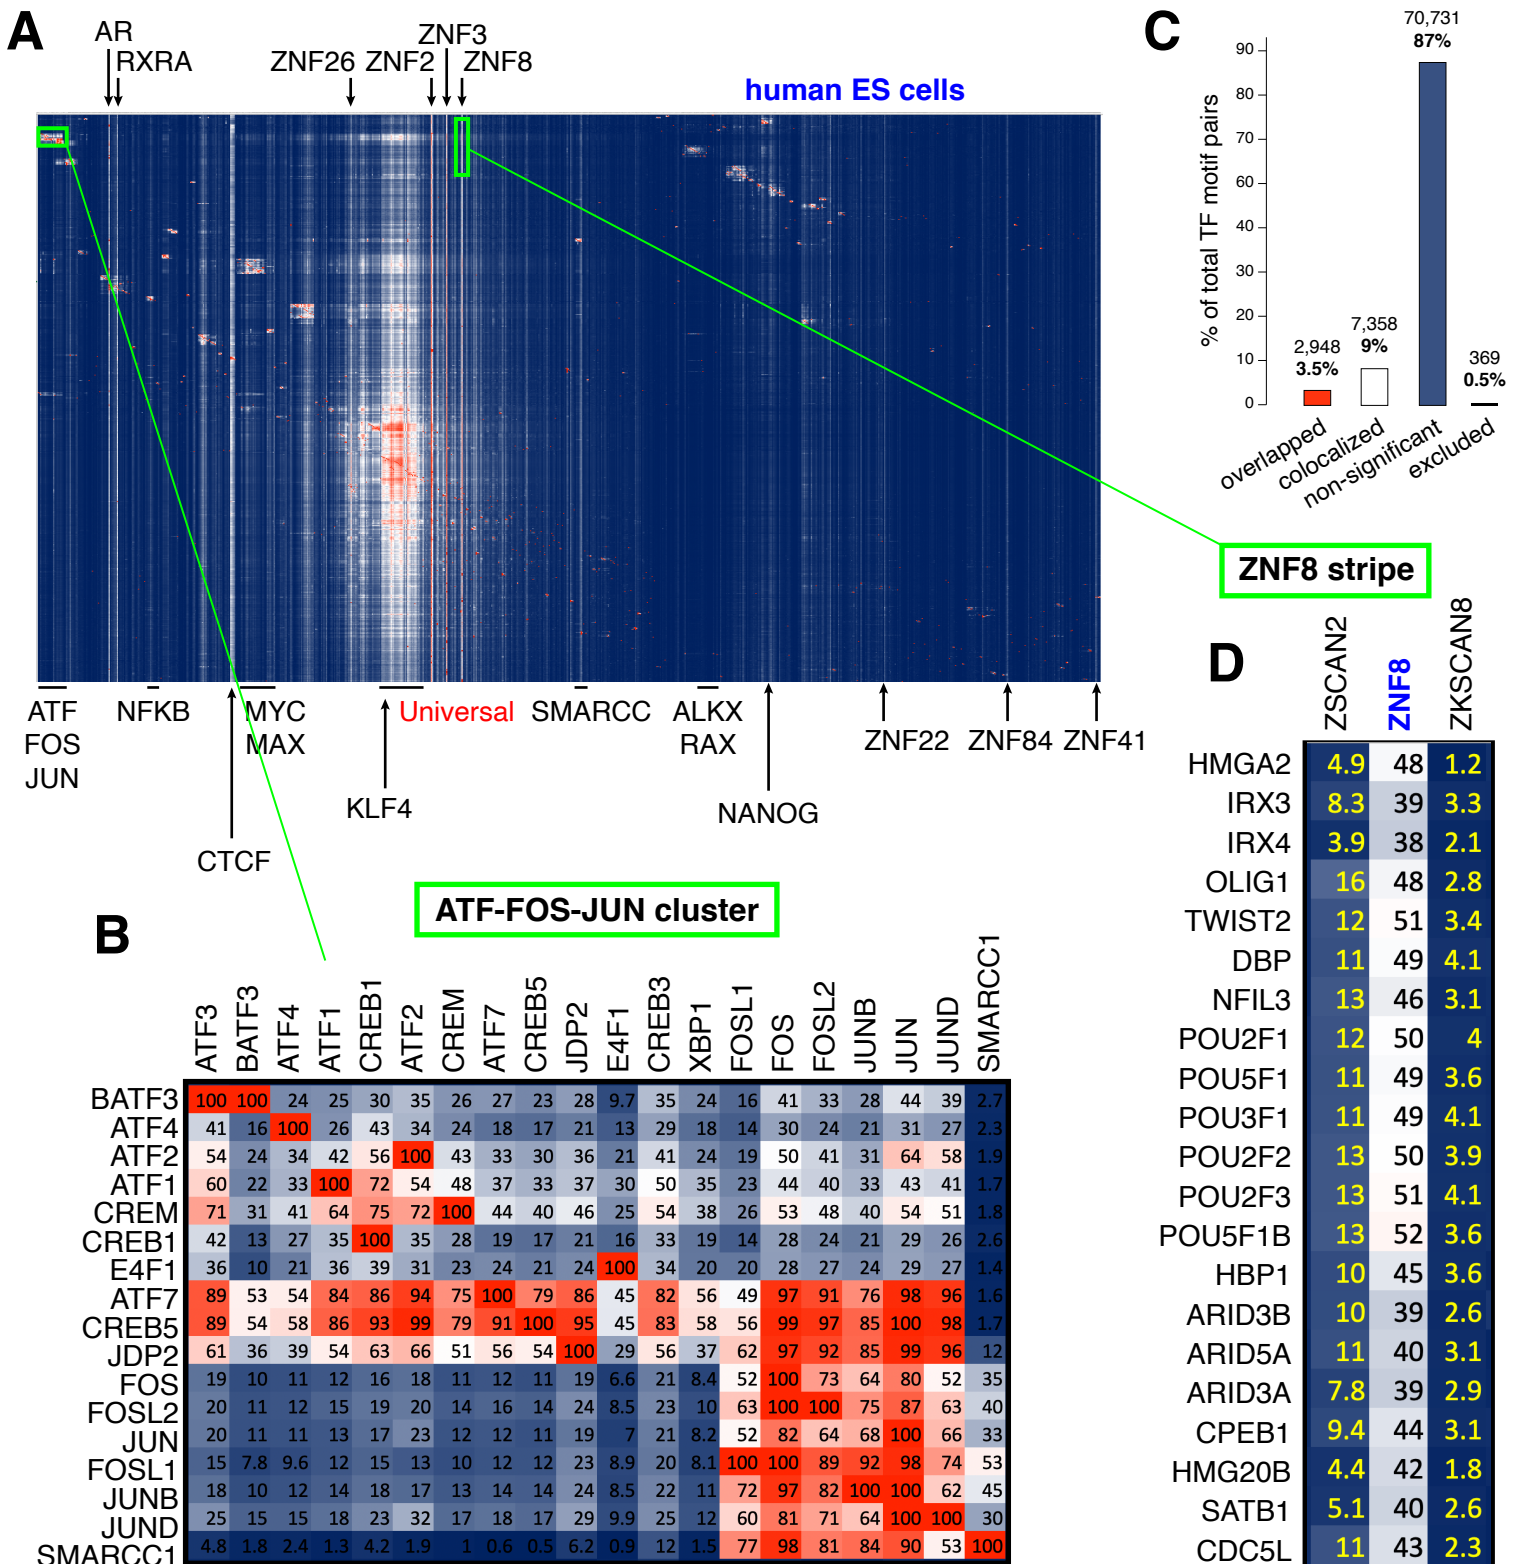

**Supplementary Figure 1, related to Figure 2. TF combinatorial preferences.** (A) Agglomerative hierarchical clustering analysis of TFs in human ES cells. Clusters of overlapped pairs are highlighted with bars below the graph while the location of stripe factors are shown with arrows. The universal stripe factor (USF) cluster is also highlighted (red). (B) Close up view of the ATF-FOS-JUN cluster (highlighted in panel A with a green rectangle). (C) Bar graph showing the percentage of human TF pairs classified as overlapped, colocalized, non-significant, or excluded. (D) Close up of the ZNF8 stripe (also highlighted in panel A with a green rectangle).

## Supplementary Figure 2

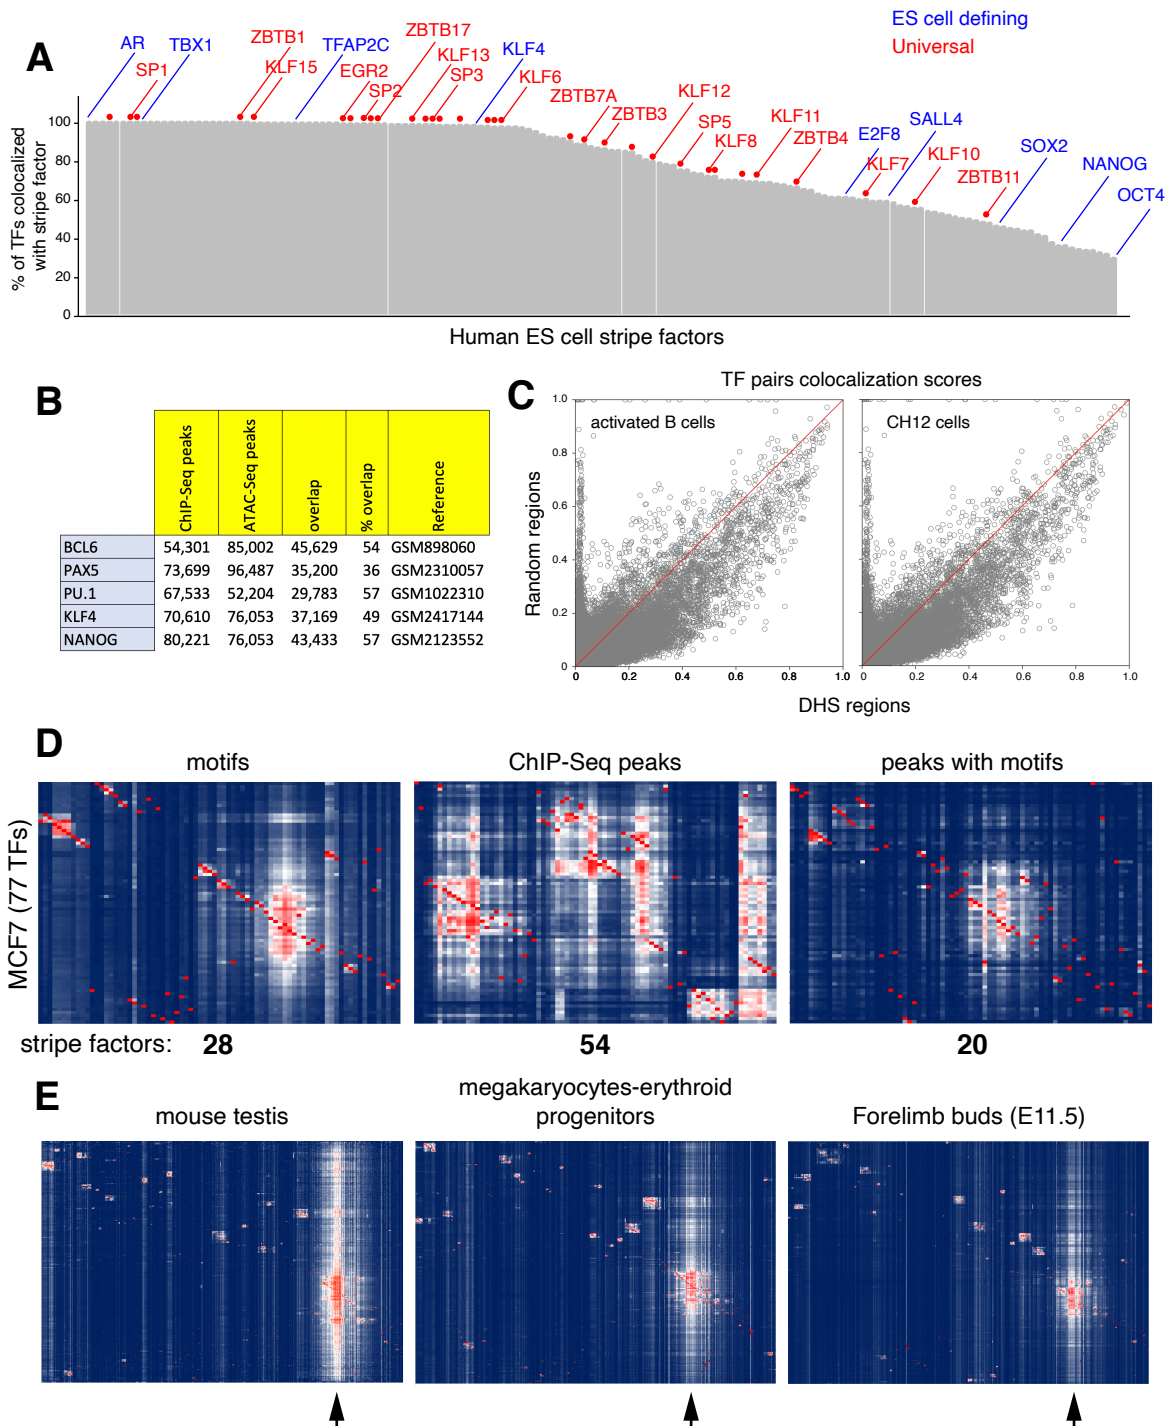

**Supplementary Figure 2, related to Figures 2 and 3. Stripe and Universal Stripe Factors. (A)** Bar graph showing the percentage of TFs colocalized with stripe factors in human ES cells. ES cell-defining factors are highlighted in blue while USFs are highlighted in red. **(B)** Table showing the overlap between TF ChIP-Seq peaks and accessible elements (ATAC-Seq peaks) as obtained from the literature (references). **(C)** Scatter plots showing TF pairs colocalization scores in 201bp random genomic regions versus DHS summits in activated B cells (left) or CH12 B cells (right). For a detailed explanation see Statistical analysis of TF motif colocalization in the Methods section. **(D)** Agglomerative hierarchical clustering of 77 TFs expressed in MCF7 cells based on TF motifs (left), ChIP-Seq peaks (middle), or ChIP-Seq peaks with cognate motifs (right). The number of stripe factors are included below each graph. **(E)** Additional examples of USF clustering (indicated with arrows) in diverse mouse cells and tissues (testis, megakaryocytes-erythroid progenitors, and forelimb buds (E11.5)).

### Supplementary Figure 3

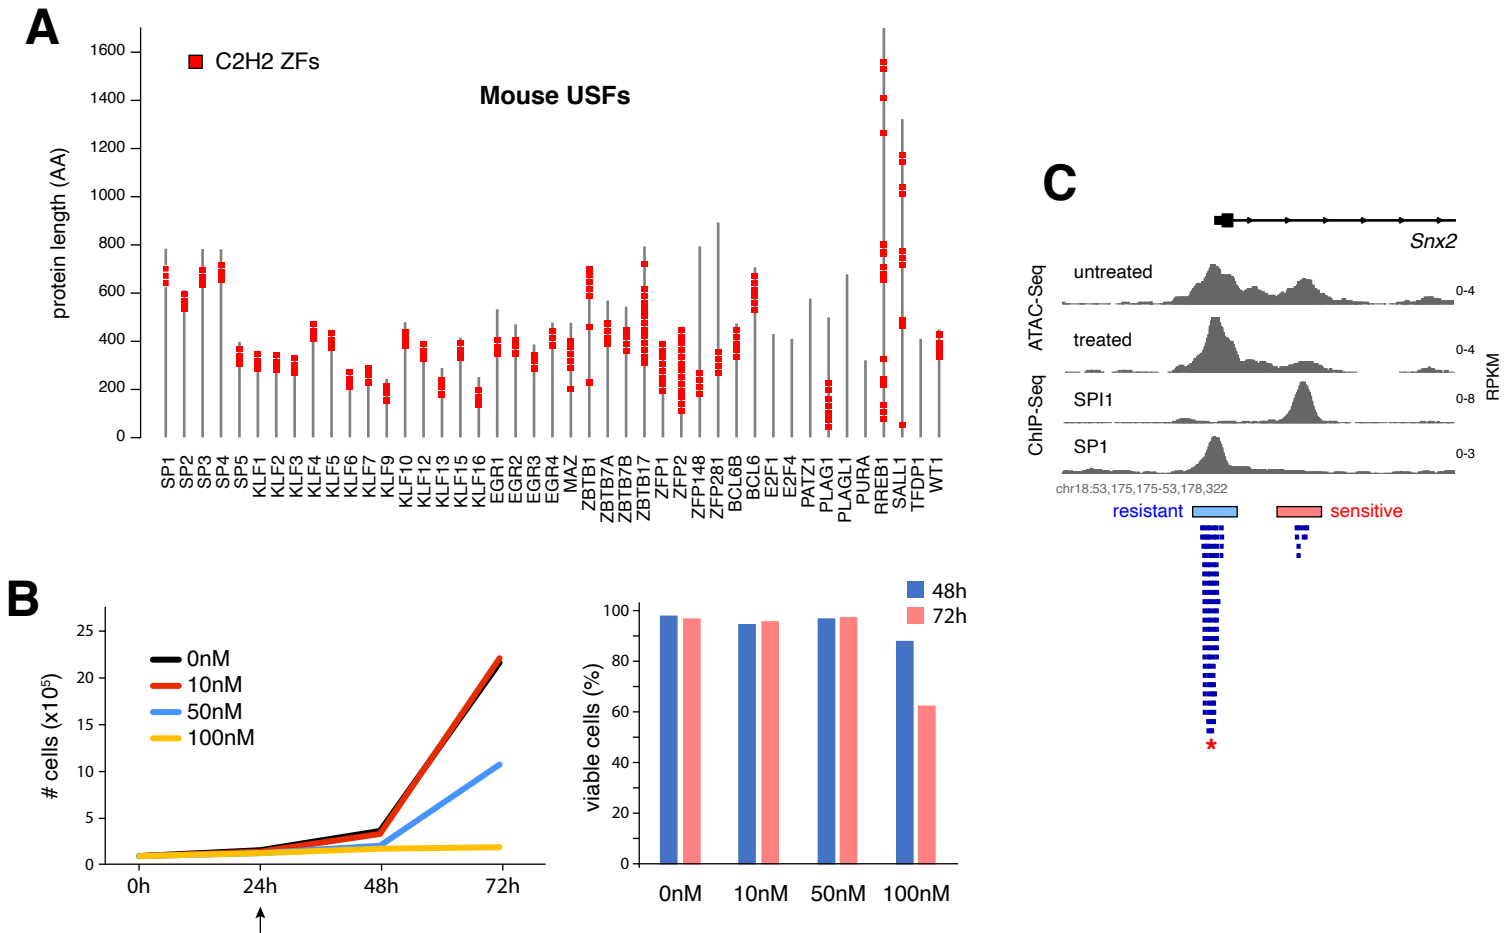

**Supplementary Figure 3, related to Figure 4. Mouse USFs and MTM treatment.** (A) Location of C2H2 ZFs (red squares) in mouse USFs. (B) Left line graph shows cell division of mouse B cells activated with LPS+IL-4 in the absence or presence of 10, 50 or 100nM of MTM. Right bar graph shows the percentage of viable cells in those cultures at 48h or 72h. (C) Example of MTM-resistant and sensitive elements at the *Snx2* locus in mouse B cells. Binding of SP1 (USF) and SPI1 (based on CHIP-Seq) and predicted TF motifs are included. Red asterisk below denotes overlapping USF motifs.

## Supplementary Figure 4

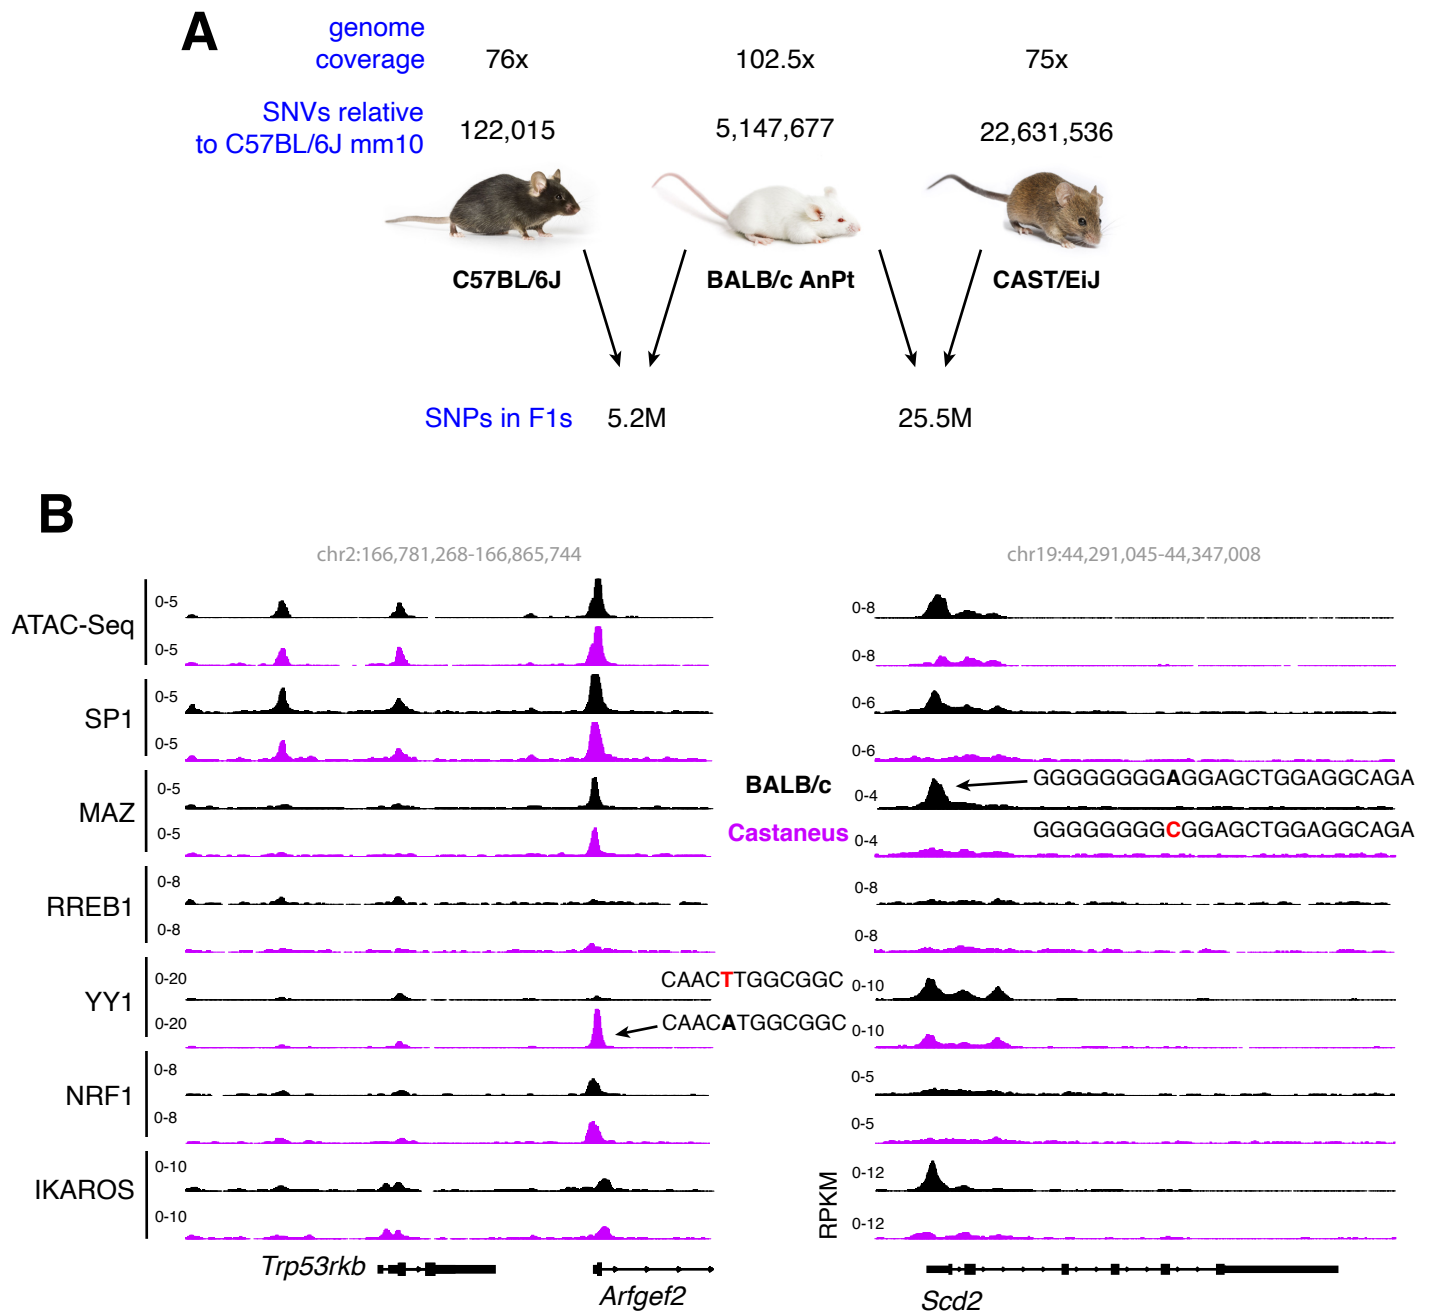

**Supplementary Figure 4, related to Figure 5. Disruption of USF binding in hybrid mouse B cells.** (A) Schematics showing sequencing coverage and number of SNPs in C57BL/6J, BALB/c AnPt, and CAST/EiJ genomes. SNPs in F1 progeny highlighted below. (B) Examples of ATAC-Seq peaks carrying single SNPs targeting YY1 (left) or MAZ (right) binding motifs. BALB/c and Castaneus alleles are depicted in black and purple respectively.

### Supplementary Figure 5

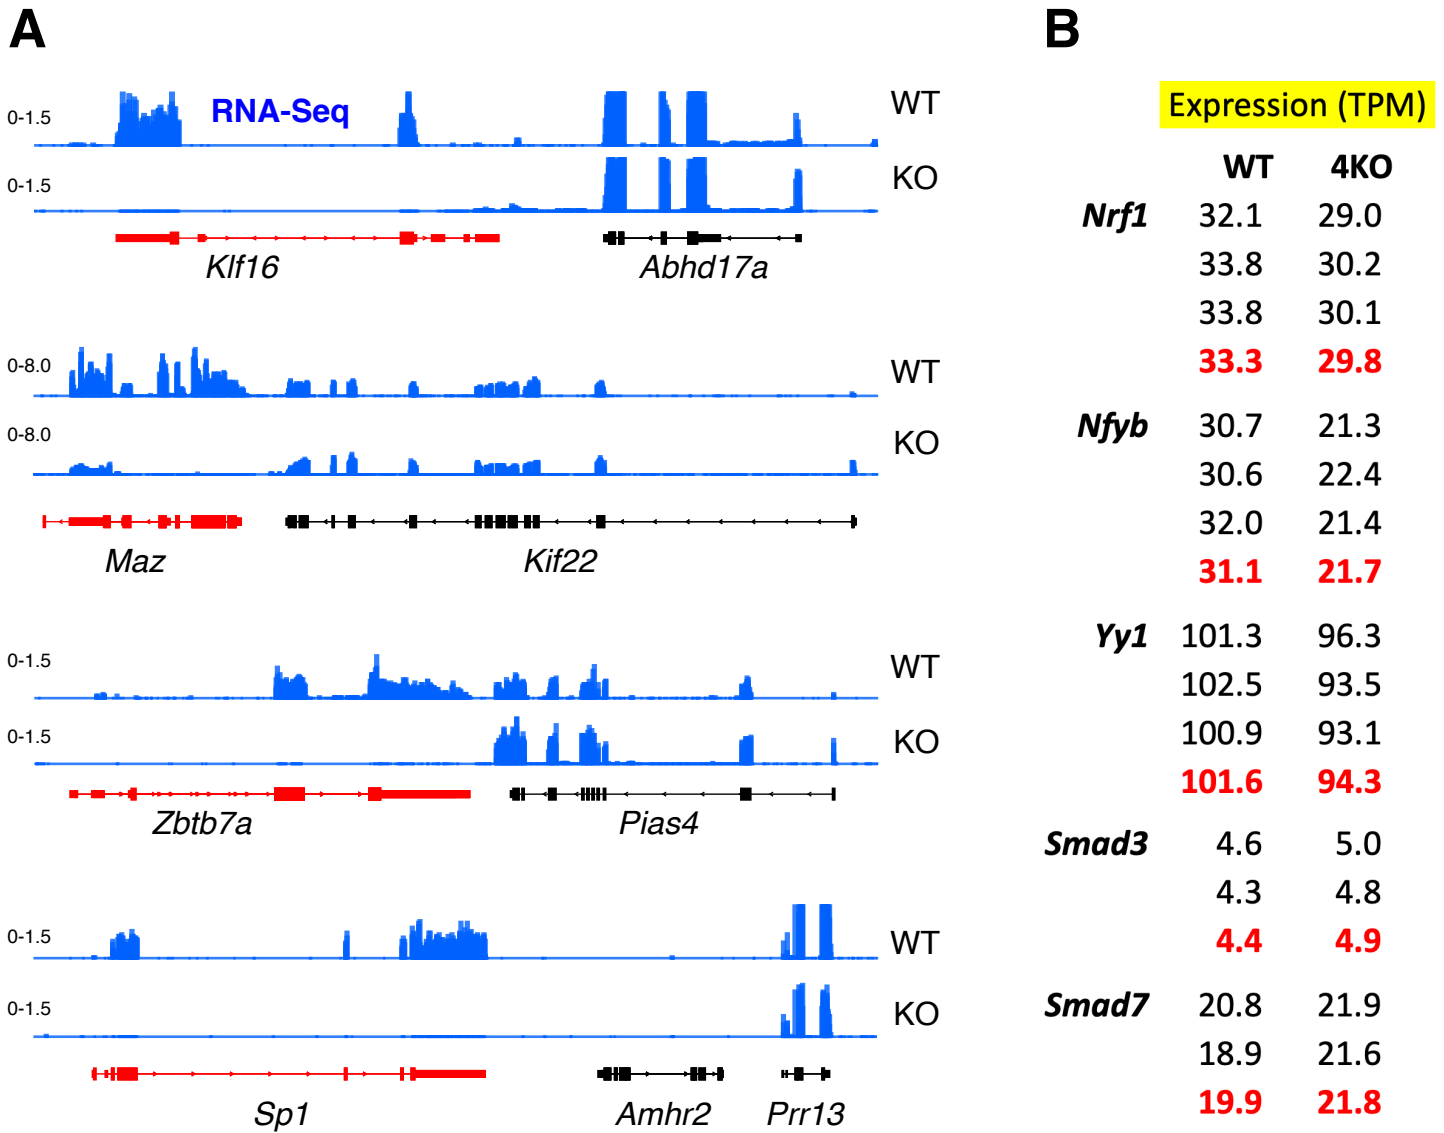

**Supplementary Figure 5, related to Figure 6. Characterization of 4KO cells. (A)** Browser tracks showing RNA-Seq analysis of WT and 4KO CH12 B cells at *Klf16*, *Zbtb7a*, *Maz*, and *Sp1* loci. **(B)** Expression of *Nrf1*, *Nfyb*, *Yy1*, *Smad3* and *Smad7* genes in WT and 4KO Ch12 B cells.

### Supplementary Figure 6

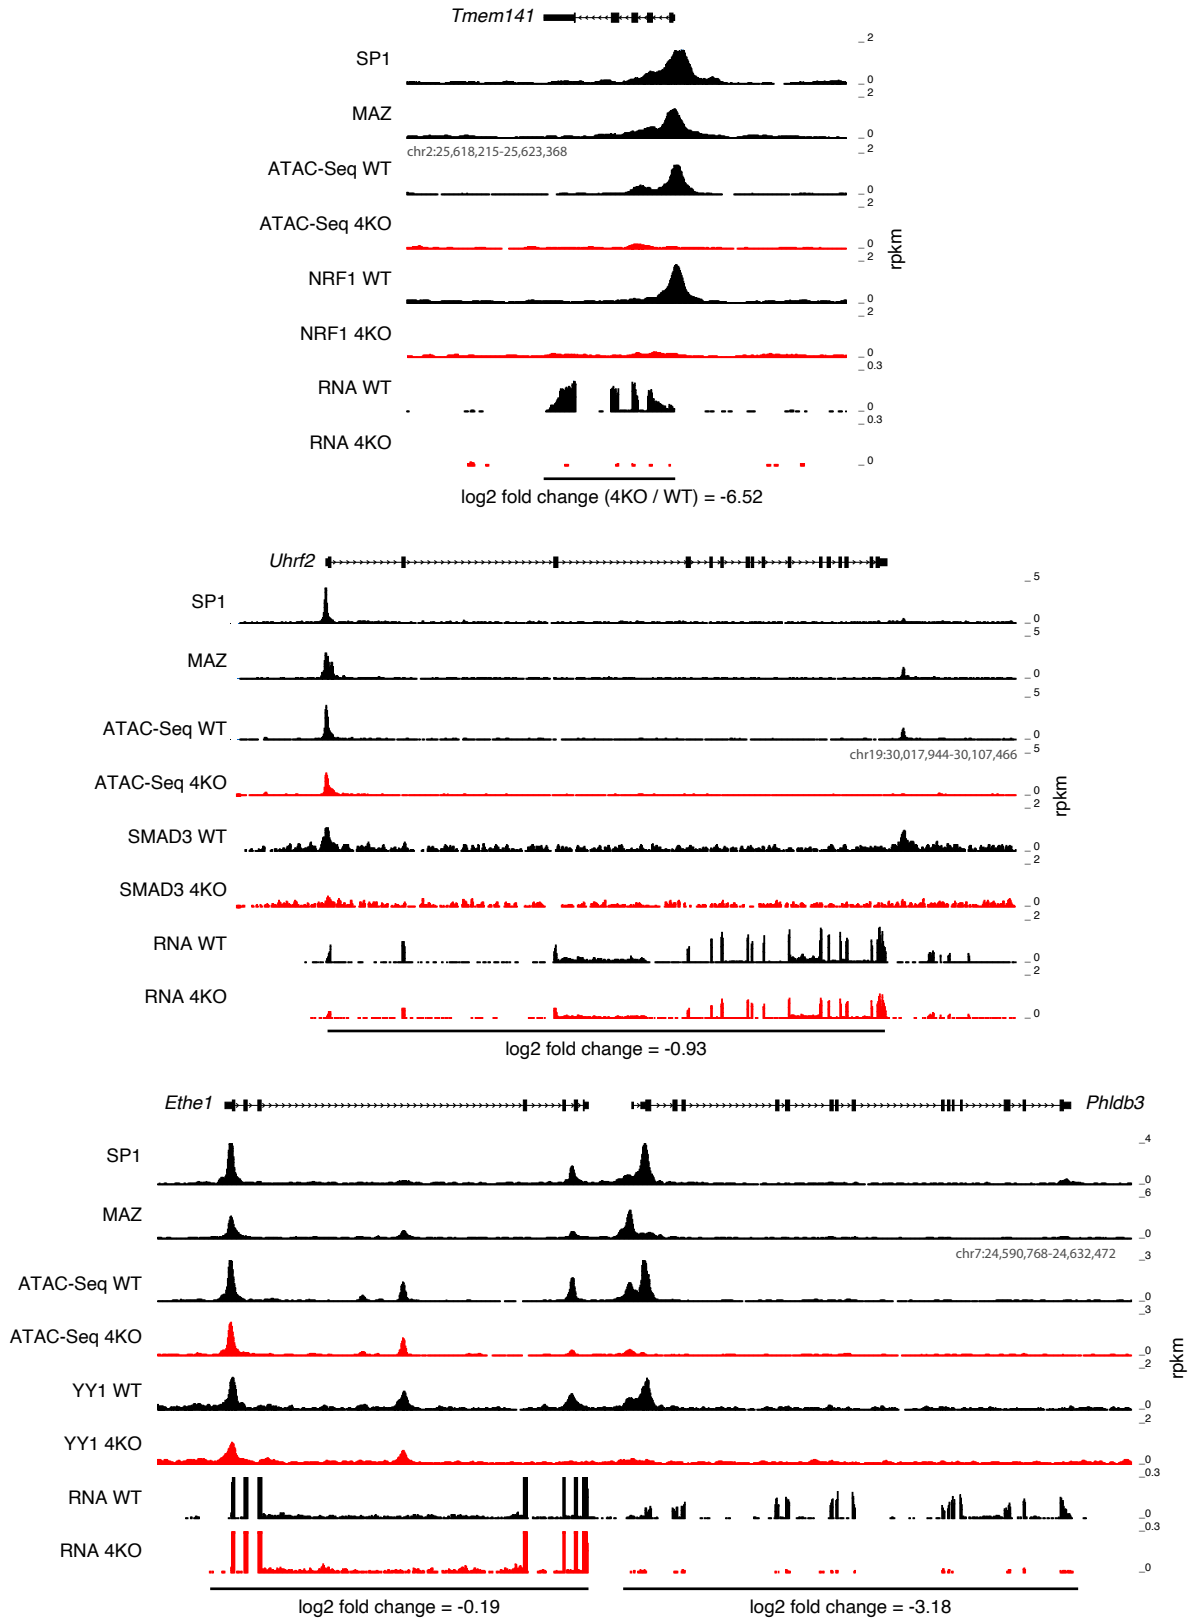

**Supplementary Figure 6, related to Figure 6. Transcriptional impact of USF deletion.** Examples of NRF1 (upper), SMAD3 (middle) and YY1 targets (lower, *Phldb3* gene) affected in 4KO cells. The  $\log_2$  fold change for total number of reads sequenced for each gene in the two cell types is included.

## Supplementary Figure 7

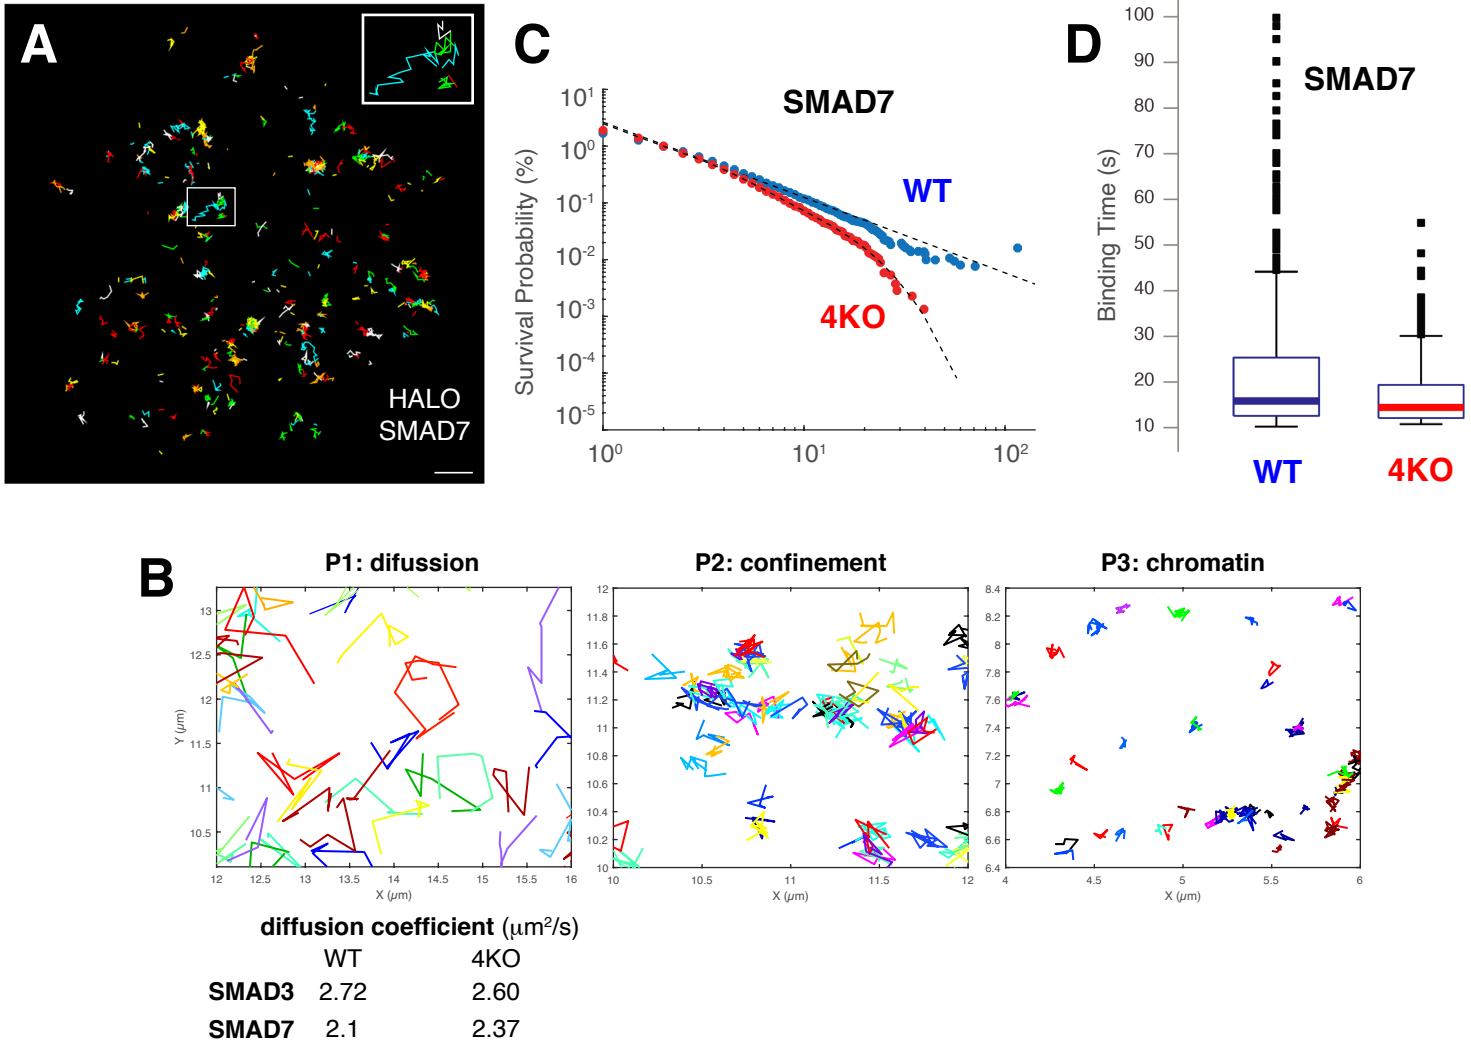

**Supplementary Figure 7, related to Figure 7. SMT analysis. (A)** Micrograph showing particle trajectories of HALO-SMAD7 in WT CH12 B cells. Colors represent different tracks. Bar = 1  $\mu\text{m}$ . **(B)** Representative examples of particle trajectories of diffusion, confinement, or chromatin-associated populations (P1, P2, and P3) as classified by SMT. Diffusion coefficients for SMAD3 and SMAD7 P1 in WT or 4KO cells are provided. **(C)** Survival probability (%) of HALO-SMAD7 molecules in WT (blue) or 4KO (red) CH12 B cells. The data was fitted to power-law or bi-exponential curves respectively. **(D)** Binding time distribution (in seconds) of HALO-SMAD7 molecules expressed in WT or 4KO cells.
